# Supplementary material
Source: PubMed Central journal article supplement (PMC4860077)
Supplement: NIHMS771101-supplement.pdf [file NIHMS771101-supplement.pdf]

For the manuscript entitled “Necroptosis: an alternative cell death program defending against cancer”, we declare no conflict of interest and all authors have agreed on the submission. We also declare that the content of the manuscript is original and has not been published or accepted for publication, either in whole or in part, in any form. No part of the manuscript is currently under consideration for publication elsewhere.

Sincerely,

A handwritten signature in black ink, appearing to read 'Lin Zhang', written in a cursive style.

Lin Zhang, Ph.D.  
Professor of Pharmacology and Chemical Biology
